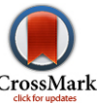

# Genomics of Post-Prandial Lipidomic Phenotypes in the Genetics of Lipid Lowering Drugs and Diet Network (GOLDN) Study

Marguerite R. Irvin<sup>1\*</sup>, Degui Zhi<sup>2</sup>, Stella Aslibekyan<sup>1</sup>, Steven A. Claas<sup>1</sup>, Devin M. Absher<sup>3</sup>, Jose M. Ordovas<sup>4,5,6</sup>, Hemant K. Tiwari<sup>2</sup>, Steve Watkins<sup>7</sup>, Donna K. Arnett<sup>1</sup>

**1** Department of Epidemiology, School of Public Health, University of Alabama at Birmingham, Birmingham, Alabama, United States of America, **2** Department of Biostatistics, School of Public Health, University of Alabama at Birmingham, Birmingham, Alabama, United States of America, **3** HudsonAlpha Institute for Biotechnology, Huntsville, Alabama, United States of America, **4** Department of Epidemiology, Atherosclerosis and Imaging, Centro Nacional de Investigaciones Cardiovasculares, Madrid, Spain, **5** Instituto Madrileño de Estudios Avanzados Alimentación, Madrid, Spain, **6** Jean Mayer USDA Human Nutrition Research Center on Aging, Tufts University, Boston, Massachusetts, United States of America, **7** Metabolon, Lipomics Division, Research Triangle Park, North Carolina, United States of America

## Abstract

**Background:** Increased postprandial lipid (PPL) response to dietary fat intake is a heritable risk factor for cardiovascular disease (CVD). Variability in postprandial lipids results from the complex interplay of dietary and genetic factors. We hypothesized that detailed lipid profiles (eg, sterols and fatty acids) may help elucidate specific genetic and dietary pathways contributing to the PPL response.

**Methods and Results:** We used gas chromatography mass spectrometry to quantify the change in plasma concentration of 35 fatty acids and 11 sterols between fasting and 3.5 hours after the consumption of a high-fat meal (PPL challenge) among 40 participants from the GOLDN study. Correlations between sterols, fatty acids and clinical measures were calculated. Mixed linear regression was used to evaluate associations between lipidomic profiles and genomic markers including single nucleotide polymorphisms (SNPs) and methylation markers derived from the Affymetrix 6.0 array and the Illumina Methyl450 array, respectively. After the PPL challenge, fatty acids increased as well as sterols associated with cholesterol absorption, while sterols associated with cholesterol synthesis decreased. PPL saturated fatty acids strongly correlated with triglycerides, very low-density lipoprotein, and chylomicrons. Two SNPs (rs12247017 and rs12240292) in the sorbin and SH3 domain containing 1 (*SORBS1*) gene were associated with b-Sitosterol after correction for multiple testing ( $P \leq 4.5 \times 10^{-10}$ ). *SORBS1* has been linked to obesity and insulin signaling. No other markers reached the genome-wide significance threshold, yet several other biologically relevant loci are highlighted (eg, *PRIC285*, a co-activator of *PPARA*).

**Conclusions:** Integration of lipidomic and genomic data has the potential to identify new biomarkers of CVD risk.

**Citation:** Irvin MR, Zhi D, Aslibekyan S, Claas SA, Absher DM, et al. (2014) Genomics of Post-Prandial Lipidomic Phenotypes in the Genetics of Lipid Lowering Drugs and Diet Network (GOLDN) Study. PLoS ONE 9(6): e99509. doi:10.1371/journal.pone.0099509

**Editor:** Daniel Monleon, Instituto de Investigación Sanitaria INCLIVA, Spain

**Received:** August 5, 2013; **Accepted:** May 15, 2014; **Published:** June 6, 2014

**Copyright:** © 2014 Irvin et al. This is an open-access article distributed under the terms of the Creative Commons Attribution License, which permits unrestricted use, distribution, and reproduction in any medium, provided the original author and source are credited.

**Funding:** The full funding information for this manuscript in correct notation is as follows: R01 HL091357/HL/NHLBI NIH HHS/United States and R01 HL104135/HL/NHLBI NIH HHS/United States. No additional external funding was received for this study. The funders had no role in study design, data collection and analysis, decision to publish, or preparation of the manuscript.

**Competing Interests:** Co-author S. Watkins is affiliated with Metabolon, Lipomics Division, Research Triangle Park, North Carolina, United States of America. This affiliation does not alter the authors' adherence to PLOS ONE policies on sharing data and materials.

\* E-mail: irvin@uab.edu

## Introduction

Hypertriglyceridemia and mixed dyslipidemia (i.e., high levels of low-density lipoprotein cholesterol (LDL-C) and triglycerides (TG) combined with decreased levels of high-density lipoprotein cholesterol (HDL-C)) are important in the development and progression of atherosclerosis [1]. Most clinical lipid measures continue to be assessed in the fasting state despite the fact that humans spend a considerable amount of time in a non-fasting, postprandial state and experience continuous fluctuations in the degree of lipemia throughout the day [2]. Large population-based studies have shown that delayed elimination of postprandial lipids increases cardiovascular disease (CVD) risk [3,4,5]. For example, the Copenhagen City Heart Study reported increasing levels of

non-fasting cholesterol and non-fasting TGs were similarly associated with increasing risk of myocardial infarction over 31 years of follow-up, with non-fasting TGs being the strongest predictor in women and non-fasting cholesterol the strongest predictor in men [6].

An increased postprandial lipid (PPL) response may be inherited [7,8]. In one report, postprandial TG levels were compared in healthy sons of men with angiographic evidence of severe coronary heart disease (CHD) versus sons of control subjects without CHD after the consumption of a high-fat liquid drink [7]. Results showed fasting lipids were comparable between groups, but the sons of men with CHD had significantly higher plasma TG levels after 8, 10, and 12 hours postprandially, suggesting delayed clearance. Additionally, our own work in GOLDN estimated the

slope of TG increase 3.5 hours after a postprandial intervention had close to 80% heritability. Despite promising hypotheses (e.g., remnant triglyceride rich lipoproteins cause endothelial dysfunction), the pathogenesis of a prolonged postprandial response remains incompletely understood [2,9]. A deeper understanding of the environmental and genetic factors influencing the PPL response will be important in developing behavioral and pharmacologic approaches to CVD prevention and treatment.

To date, studies seeking to identify genetic predictors of the PPL response in free-living populations can claim qualified success. A number of studies have documented that variants in genes such as *APOA1*, *A2*, *A4*, *A5*, *E*, *C1*, *C3*; *LPL*; *LIPC*; *SCARB1*; *MTP*, *GCKR*; and those encoding fatty acid binding and transport proteins, explain some of the inter-individual variability [2,10,11]. Despite progress, current findings do not fully explain the heritable component of the PPL response. The lipidome, as a subset of the metabolome, may offer more precise postprandial phenotypes than clinically measured lipid species. Previous studies have suggested lipidomic profiles are both heritable and under strong genetic control [12,13]. We hypothesize that a controlled diet intervention enriched for saturated fat and cholesterol will allow more precise assessment of lipidomic postprandial changes [14] and will facilitate genetic and epigenetic discovery. The current study measured sterols and total fatty acid content across lipid classes in human plasma after a PPL intervention as part of the Genetics of Lipid-lowering Drugs and Diet Network Study (GOLDN). Genome-wide association study (GWAS) data and epigenome-wide association study (EWAS) data assayed using the Affymetrix 6.0 and the Illumina Methy450 array, respectively, were associated with newly captured phenotypes before and after the high fat meal. Previous studies have identified correlations between genetic variation and the quantitative trait of DNA methylation enriched at nearby loci (cis-meQTLs) [15]. To interpret the potential for functional crosstalk between DNA sequence variants and methylation marks, we also examined cis-meQTLs in regions with overlapping GWAS and EWAS association.

## Methods

### Ethics Statement

The study protocol was approved by the Institutional Review Boards at the University of Minnesota, University of Utah, Tufts University/New England Medical Center, and the University of Alabama at Birmingham. Written informed consent was obtained from all participants.

### Study population

The GOLDN study was designed to identify genes that determine response of lipids to two interventions, one to raise (ingestion of high-fat meal) and one to lower lipid levels (fenofibrate treatment) [16] (registered at [clinicaltrials.gov](http://clinicaltrials.gov), number NCT00083369; URL, <http://clinicaltrials.gov/ct2/show/NCT00083369>). The GOLDN study has been previously described in Irvin *et al.* [17]. Briefly, the study ascertained and recruited families from the Family Heart Study at two centers, Minneapolis, MN and Salt Lake City, UT, who were self-reported to be white. In each case, only families with at least two siblings were recruited and only participants who did not take lipid-lowering agents (pharmaceuticals or nutraceuticals) for at least 4 weeks prior to the initial visit were included. A total of 1048 GOLDN participants were included in the diet intervention. For the current study, sterols and fatty acids were measured from stored plasma (−80 degrees Celsius) collected at fasting and

3.5 hours after the diet intervention (described below) for 40 GOLDN participants from 24 independent families, for whom EWAS data and GWAS data were available. The 3.5 hour time point was chosen for this study as it maximized the postprandial differences observed between individuals in our data facilitating genomic discovery. The phenotype and genotype data relevant to this study was deposited in The database of Genotypes and Phenotypes (dbGaP) with accession number phs000741.v1.p1.

### Postprandial intervention and clinical measurements

For the GOLDN diet intervention, participants were asked to fast for  $\geq 12$  hours and abstain from alcohol intake for  $\geq 24$  hours before visiting the clinic. The PPL intervention followed the protocol of Patsch *et al.* [18]. The whipping cream/dry milk meal had 700 calories/m<sup>2</sup> body surface area (2.93 MJ/m<sup>2</sup> body surface area); 3% of calories were derived from protein (instant nonfat dry milk), 14% from carbohydrate (sugar), and 83% from fat sources (heavy whipping cream). The ratio of polyunsaturated to saturated fat was 0.06 and the cholesterol content of the average meal was 240 mg. The mixture was blended with ice and 15 mL of chocolate- or strawberry-flavored syrup to increase the palatability. Blood samples were drawn immediately before (fasting) and at 3.5 and 6 hours after consuming the high-fat meal. At each of the three time points TGs were measured by glycerol-blanked enzymatic method. Cholesterol was measured using a cholesterol esterase-cholesterol oxidase reaction. The same reaction was also used to measure HDL-C after precipitation of non-HDL-C with magnesium/dextran. LDL-C was measured by a homogeneous direct method. We also used nuclear magnetic resonance (NMR) spectroscopy to measure very low-density lipoprotein cholesterol (VLDL-C) and chylomicrons. TGs, HDL-C, LDL-C, VLDL-C, chylomicrons and total cholesterol as described are referred to as clinical lipids in the context of this study. The remaining clinical measures were captured only once at fasting (or baseline) and include high-sensitivity C-reactive protein (hsCRP) measured on the Hitachi 911 using a latex particle enhanced immunoturbidimetric assay (Kamiya Biomedical Company, Seattle, WA, USA). Interleukin-6 (IL6), IL-2 soluble receptor (IL2sR)- $\alpha$ , tumor necrosis factor (TNF)- $\alpha$ , and monocyte chemoattractant protein-1 (MCP1) were measured using quantitative sandwich enzyme immunoassay techniques (ELISA kit assays, R&D Systems Inc., Minneapolis, MN, USA) as described in previous publications [19,20]. Plasma adiponectin and insulin were measured by a commercial kit using competitive RIA (Linco Research, St Charles, MO, USA). Plasma glucose was determined by a hexokinase-mediated reaction on the Hitachi commercial kit (Roche Diagnostics). We measured weight with a beam balance, hip circumference at maximal hip girth, and waist circumference at the umbilicus. Body mass index (BMI) was calculated as weight (kg)/height (m)<sup>2</sup>.

### TrueMass sterol panel

Deuterium-labeled internal standards were added to 25 mL of stored plasma from blood drawn at 0 and 3.5 hours and the mixture was saponified in ethanolic KOH. Free sterols were extracted in hexane:ethanol, dried under nitrogen, and derivatized with Tri-Sil in decane. The silylated free sterols were injected onto a 6890/5975 GC/MS (Agilent Technologies, CA) with a DB-5MS UI column (Agilent Technologies, CA) with helium as the carrier. Mass spectroscopic analysis was performed in the single ion monitoring (SIM) mode with electron ionization. Prior to each assay the instruments were calibrated including analysis of reference standards. Quality control (QC) samples were included with each batch to continuously monitor the accuracy of the

platform with time. The absolute concentration of each sterol was determined by comparing the peak to that of the relevant internal standard. A total of 11 sterols were quantified in nmols/gram of sample including total cholesterol, 7-dehydrocholesterol, desmosterol, lanosterol, lathasterol, cholestanol, coprostanol, b-sitosterol, campesterol, stigmasterol, and 7 $\alpha$ -hydroxycholesterol (Lipomics, West Sacramento, CA).

### TrueMass fatty acid panel

Lipids were extracted from 25 mL of stored plasma from blood drawn at 0 3.5 hours in the presence of authentic internal standards by the method of Folch *et al.* [21]. The total lipid extract was trans-esterified in sulfuric acid/methanol to create fatty acid methyl esters (FAME). The FAME were extracted into hexane and prepared for gas chromatography. Individual fatty acids were separated and quantified by capillary gas chromatography (Agilent Technologies model 6890) equipped with a 30 m HP-88 capillary column (Agilent Technologies) and a flame-ionization detector. Instruments were calibrated and QC samples were included in each batch to continuously monitor the accuracy of the platform with time. The absolute concentration of each fatty acid in the original sample was determined by comparing the peak area to that of the internal standard. A total of 35 fatty acids were quantified in nmols/gram of sample including myristic acid (14:0); pentadecanoic acid (15:0); palmitic (16:0) acid; stearic acid (18:0); arachidic acid (20:0); behenic acid (22:0); lignoceric acid (24:0); myristoleic acid (14:1n5); palmitoleic acid (16:1n7); palmitoleic acid (t16:1n7); oleic acid (18:1n9); elaidic acid (t18:1n9); vaccenic acid (18:1n7); linoleic acid (18:2n6); g-linolenic acid (18:3n6); a-linolenic acid (18:3n3); stearidonic acid (18:4n3); eicosenoic acid (20:1n9); eicosadienoic acid (20:2n6); mead acid (20:3n9); di-homo-g-linolenic acid (20:3n6); arachidonic acid (20:4n6); eicosa-tetraenoic acid (20:4n3); eicosapentaenoic acid (20:5n3); erucic acid (22:1n9); docosadienoic acid (22:2n6); adrenic acid (22:4n6); docosapentaenoic acid (22:5n6); docosapentaenoic acid (22:5n3); docosahexaenoic acid (22:6n3); nervonic acid (24:1n9); and plasmalogen derivatives of 16:0, 18:0, 18:1n9, and 18:1n7 (Lipomics, West Sacramento, CA).

### Genotyping

DNA extraction and purification in the GOLDN study using commercial Puregene reagents (Gentra System, Inc, Minneapolis, MN), following the manufacturer's instructions has been described in Irvin *et al.* [17]. A total of 906,600 SNPs were genotyped and called using the Birdseed calling algorithm [22]. Comprehensive QC procedures excluded SNPs that were monomorphic (55,530) or had a call rate of less than 96% (82,462). In addition, SNPs were excluded from the analysis on the basis of Mendelian errors (45,778), failing the Hardy–Weinberg equilibrium test at  $P < 1.0 \times 10^{-6}$  (748) or minor allele frequency (MAF)  $< 1\%$  (63,908). Among the larger GOLDN population, SNPs passing QC were used to impute untyped SNPs using MaCH software (Version 1.0.16) with HapMap Phase II (release 22, Human Genome build 36) as the reference. Further QC excluded SNPs with discrepant alleles in comparison to mlnfo in MaCH and missing strand information. After the imputation, we created a hybrid dataset that included 2,543,887 SNPs, of which 584,029 were initially genotyped in the GOLDN population. Missing genotyped data were kept as missing in the final data set. To avoid false positive effects from associations based on very small numbers, we limited the current analysis to SNPs with MAF  $\geq 5\%$  for a total of 2,160,736 SNPs.

### Epigenotyping

Key genes in lipid metabolism are expressed in lymphocytes (e.g., peroxisome proliferator activated receptor a (*PPARA* [23,24,25])) and CD4+ T-cells were harvested from stored lymphocytes (collected at fasting) using antibody-linked Invitrogen Dynabeads [26]. We lysed cells captured on the beads and extracted DNA using DNeasy kits (Qiagen, Venlo, Netherlands). The Illumina Infinium Human Methylation450 Beadchip was used to assess  $\sim 470,000$  autosomal CpG sites across the genome [27]. Our methods have been extensively described in Absher *et al.* [28]. For each assay, 500 ng of DNA was treated with sodium bisulfite (Zymo EZ DNA) prior to standard Illumina amplification, hybridization, and imaging steps. The resulting intensity files were analyzed with Illumina's GenomeStudio, which generated beta scores (proportion of total signal from the methylation specific probe or color channel) and "detection *P*-values" (probability that the total intensity for a given probe falls within the background signal intensity). Beta scores with an associated detection *P*-value greater than 0.01 were removed and samples with more than 1.5% missing data points were eliminated from further analysis. Furthermore, any CpG probes where more than 10% of samples failed to yield adequate intensity were removed. The filtered beta scores were then subjected to batch normalization with the ComBat package for R software in non-parametric mode (<http://www.bu.edu/jlab/wp-assets/ComBat/Abstract.html>). After quality control, we had data for 461,281 CpGs. Residual cell type impurities may confound epigenetic association studies.[29] Therefore, principal components based on the beta scores of all autosomal CpGs passing QC were generated and have been modeled in EWAS analyses to account for residual T-cell impurities and other technical artifacts [28]. Principal components based on the beta scores of all autosomal CpGs passing QC were generated using the *prcomp* function in R (V 2.12.1).

### Analysis

Change in each sterol and fatty acid concentration was calculated as the difference between the 3.5 hour and baseline concentrations. Statistical significance was evaluated by a test of whether the intercept associated with change was different from zero after adjustment for a random effect of family id using a linear mixed model. Pearson correlation coefficients were calculated between each sterol, fatty acid, and clinical measurements at fasting and for change with PPL. A clusterogram of fasting and postprandial correlation coefficients was constructed using the heatmap.2 function in the gplots package in R [30]. Next, we evaluated the additive effect of 2,160,736 SNPs on each fasting sterol and fatty acid concentration using mixed models adjusted for age, sex, center, and a random effect of family relationship. GWAS models implemented to evaluate postprandial sterols and fatty acids were similar but additionally adjusted for fasting concentration. We have previously reported this population to be very genetically homogeneous, and, therefore, we did not adjust for population substructure [20,31]. For the epigenome-wide analysis, each individual sterol and fatty acid was regressed on the methylation beta score at each of the 461,281 sites adjusting for age, sex, center, and the first 4 principal components (generated to capture T-cell impurity) as fixed effects and a random effect of family. We chose 4 PCs based upon the eigenvalues and scree plot of 20 estimated PCs based on methylation data of the larger GOLDN population. Postprandial EWAS models additionally included adjustment for fasting sterol or fatty acid concentration. EWAS and GWAS models were implemented in the R *kinship* package (*lmekin* function) [32].

GWAS and EWAS analyses generated a large number of hypotheses requiring careful corrections for multiple testing. Given observed correlations among the lipidomic phenotypes we used matrix spectral decomposition [33] as a data reduction technique to estimate the number of independent sterol phenotypes (9 of 11 were independent) and the number of independent fatty acid phenotypes (17 of 35 were independent). Using the most conservative approach (the Bonferroni correction) for GWAS, alpha ( $\alpha$ ) was set to  $0.05/(2,160,736*9) = 2.6*10^{-9}$  for sterols, and, likewise,  $\alpha = 0.05/(2,160,736*17) = 1.4*10^{-9}$  for fatty acids. Correction for multiple testing during EWAS followed similar logic ( $\alpha = 1.2*10^{-8}$  and  $\alpha = 6.4*10^{-9}$  for sterols and fatty acids, respectively). SNPs and CpGs with association  $P$ -value  $< 1.0*10^{-4}$  were annotated using the UCSC genome browser and ANNOVAR [34,35].

The UCSC Batch Coordinate Conversion (liftOver) module was used to convert genome coordinates of SNPs from hg18 to hg19 similarly as CpG sites. Any regional overlap (within 20 kb) of EWAS and GWAS signals of at least marginal significance (defined as  $P < 1.0*10^{-4}$ ) was identified. SNP association with methylation beta score was examined (cis-meQTL association) in regions of overlap adjusting for covariates (age, sex, center, methylation data PCs) as fixed effects and family structure as a random effect.

## Results

Participants were on average  $51.2 \pm 13$  years old, 55% were male, and 60% were recruited from the GOLDN Minneapolis field center. For a comparison of clinically measured lipids at fasting and 3.5 hours after the intervention and other relevant variables measured in GOLDN among the 40 participants see Table S1. Mean concentration for each of the 11 sterols and 35 fatty acids are presented in Table 1. The average fasting values of each metabolite were within the normal range set by TrueMass internal standards and representative of the assay's typical performance. On average campesterol, b-sitosterol, desmosterol, coprostanol, and cholesterol increased 3.5 hours after the high-fat diet intervention and lathosterol and lanosterol decreased. Stigmasterol, 7-dehydrocholesterol, and 7 $\alpha$ -hydroxycholesterol did not significantly change. Overall, total plasma fatty acids increased postprandially (Table 1). Pairwise correlations between fasting clinical measures, inflammatory markers, and newly captured fatty acids and sterols are presented in Figure 1a. In the fasting state, inflammatory markers, BMI, insulin and glucose did not strongly correlate with clinical lipids, fatty acids, or sterols. Fatty acids were strongly and positively correlated with each other in addition to TG and VLDL-C. The strongest correlations observed were among TG, VLDL-C, oleic acid and vaccenic acid. LDL-C and total cholesterol moderately correlated with plasmalogens and longer chain saturated fatty acids. Sterols, including stigmasterol, campesterol, b-sitosterol, and cholesterol, were strongly and positively correlated in the fasting state while lanosterol and lathosterol were negatively correlated with those sterols. Figure 1b shows pairwise correlations among the changes in PPL clinical lipids, fatty acids, and sterols. Many of the observed trends were consistent with that observed at fasting or were stronger, particularly saturated fatty acids (palmitic acid, pentadecanoic acid, myristic acid, and stearic acid) and their biosynthetic products (myristoleic acid, vaccenic acid, oleic acid, and elaidic acid) were strongly correlated with VLDL-C and TG. In the postprandial state, change in chylomicrons positively correlated with that group while change HDL-C negatively correlated with that group.

Manhattan plots of association signals with  $P < 1.0*10^{-4}$  from EWAS and GWAS of fasting sterols and fatty acids are presented in Figure 2. GWAS results from each of 11 sterols are combined in the upper right hand quadrant of Figure 2 and, likewise, GWAS results for each of the 35 fatty acids are combined in the bottom right hand quadrant. For a complete list of all CpGs and SNPs (including annotations) shown in Figure 2, see Spreadsheet S1. Table 2 highlights GWAS and EWAS results from analysis of fasting sterol and fatty acids with  $P < 1.0*10^{-7}$ . For sterols the strongest genetic signal ( $P < 4.5*10^{-9}$  for each of 5 SNPs) came from a region on chromosome 10 within the sorbin and SH3 domain containing 1 gene (*SORBS1*). The top two SNPs (rs12247017 and rs12240292) met significance criteria ( $P < 2.6*10^{-9}$ ) after correction for multiple testing. The second strongest signal ( $P < 1.8*10^{-8}$  for each of 3 SNPs) was for 7 $\alpha$ -hydroxycholesterol in the semaphorin 6D (*SEMA6D*) gene on chromosome 15. Each of the 3 SNPs lies in the first intron of an alternate transcript of *SEMA6D*. Fourteen intronic SNPs in *SEMA5D* on chromosome 5 were strongly associated with fasting b-sitosterol ( $P \leq 9.8*10^{-8}$ ). A SNP (rs3918278) on chromosome 20 upstream of the matrix metalloproteinase 9 (*MMP9*) gene was also associated with b-sitosterol ( $P = 5.6*10^{-8}$ ). In EWAS, no CpG was statistically significantly associated with any sterol after correction for multiple testing. Table 2 highlights a CpG (cg02621636) on chromosome 11 associated with coprostanol in the 3' UTR of the membrane-spanning 4-domains, subfamily A, member 7 gene (*MS4A7*). Finally, no SNP or CpG was statistically significantly associated with any of the 35 fasting fatty acid concentrations considered (Figure 2). Marginally significant markers are highlighted in Table 2 and include 2 SNPs on chromosome 5 upstream of the protein phosphatase 2, regulatory subunit B, beta gene (*PPP2R2B*) associated with di-homo- $\gamma$ -linoleic acid (DGLA).

Manhattan plots of association signals with  $P < 1.0*10^{-4}$  from EWAS and GWAS of postprandial sterols and fatty acids (adjusted for fasting concentrations) are presented in Figure 3. For a complete list of all CpGs and SNPs (including annotations) shown in Figure 3, see Spreadsheet S2. Table 3 highlights GWAS and EWAS results from the postprandial analysis of sterols and fatty acids with  $P < 1.0*10^{-7}$ . No marker in EWAS or GWAS was statistically significantly associated with any PPL sterol or fatty acid after correction for multiple testing. Marginally significant sterol GWAS signals included 5 markers on chromosome 14 associated with coprostanol that were not near (within 200kb up or downstream) any characterized gene. Four SNPs on chromosome 5 were also associated with postprandial coprostanol concentration after adjustment for fasting concentration. The region is gene rich and the 4 SNPs lie in intron 1 of an alternate transcript of the Kv channel interacting protein 1 (*KCNIP1*) gene in addition to intron 1 of a smaller overlapping gene known as potassium large conductance calcium-activated channel, subfamily M, beta member 1 (*KCNMB1*). No CpGs were associated with any postprandial sterol with  $P < 1.0*10^{-7}$  and, thus, are not represented in Table 3. The SNP rs666566 in the microtubule-associated protein 6 (*MAP6*) gene associated with docosahexaenoic acid (DHA) was the top hit for the fatty acid GWAS. The same SNP was also associated with 7 $\alpha$ -hydroxycholesterol. Another SNP (rs685448) in *MAP6* was associated with DHA with  $P = 1.5*10^{-7}$  and with 7 $\alpha$ -hydroxycholesterol with  $P = 9.5*10^{-5}$ . A group of SNPs (rs16843235, rs2759275, rs16843150) upstream of ATPase, H<sup>+</sup> transporting, lysosomal 13kDa, V1 subunit *G3* (*ATP6V1G3*) were associated with palmitelaidic acid. Finally, two CpGs are highlighted in Table 3 for fatty acids, the first (cg15718583) with DGLA in the EPH receptor B3 (*EPHB3*) gene and another

**Table 1.** Average concentration (nmol/gram of sample) of TrueMass panel metabolites measured at fasting and 3.5 hours after a postprandial lipemia (PPL) challenge for 40 Genetics of Lipid Lowering Drugs and Diet Network Study participants.

| TrueMass Panel Metabolites           | Fasting       | 3.5 hrs        | Direction* | P-value |
|--------------------------------------|---------------|----------------|------------|---------|
| <i>Sterols</i>                       |               |                |            |         |
| total cholesterol                    | 4388.86±617.2 | 4561.12±599.6  | Up         | 0.0006  |
| 7-dehydrocholesterol                 | 6.32±2.3      | 6.56±2.5       | Up         | 0.2038  |
| desmosterol                          | 3.45±1.1      | 3.62±1.2       | Up         | 0.0001  |
| lanosterol                           | 0.42±0.2      | 0.38±0.1       | Down       | 0.0012  |
| lathasterol                          | 13.99±4.7     | 13.47±5.4      | Down       | 0.0484  |
| cholestanol                          | 8.91±2.3      | 9.21±2.1       | Up         | 0.0101  |
| coprostanol                          | 0.08±0.05     | 0.09±0.05      | Up         | 0.0017  |
| b-sitosterol                         | 11.20±5.2     | 11.86±4.7      | Up         | <0.0001 |
| campesterol                          | 6.38±3.1      | 6.83±3.0       | Up         | <0.0001 |
| stigmasterol                         | 0.48±0.2      | 0.51±0.2       | Up         | 0.2049  |
| 7α-hydroxycholesterol                | 0.94±0.4      | 0.90±0.4       | Down       | 0.2443  |
| <i>Fatty acid</i>                    |               |                |            |         |
| myristic acid (14:0)                 | 206.86±88.8   | 934.74±371.0   | Up         | 0.0003  |
| pentadecanoic acid (15:0)            | 40.97±11.1    | 111.60±35.1    | Up         | <0.0001 |
| palmitic acid (16:0)                 | 3367.23±769.7 | 5715.29±1369.6 | Up         | <0.0001 |
| stearic acid (18:0)                  | 1062.27±198.1 | 1942.90±502.7  | UP         | <0.0001 |
| arachidic acid (20:0)                | 11.62±3.21    | 20.73±4.76     | Up         | <0.0001 |
| behenic acid (22:0)                  | 20.03±7.83    | 21.68±5.94     | Up         | 0.0411  |
| lignoceric acid (24:0)               | 17.80±7.41    | 19.29±5.68     | Up         | 0.1372  |
| myristoleic acid (14:1n5)            | 17.33±9.68    | 101.82±28.58   | Up         | <0.0001 |
| palmitoleic acid (16:1n7)            | 318.60±127.4  | 462.49±155.0   | Up         | <0.0001 |
| vaccenic acid (18:1n7)               | 235.01±59.53  | 326.19±68.81   | Up         | <0.0001 |
| oleic acid (18:1n9)                  | 3181.79±830.1 | 4942.18±1322.7 | Up         | <0.0001 |
| eicosenoic acid (20:1n9)             | 22.06±6.32    | 27.94±6.91     | Up         | <0.0001 |
| mead acid (20:3n9)                   | 17.53±5.7     | 20.20±7.0      | Up         | <0.0001 |
| erucic acid (22:1n9)                 | 5.18±1.13     | 7.15±6.37      | Up         | 0.0645  |
| nervonic acid (24:1n9)               | 13.50±3.49    | 13.63±2.24     | Up         | 0.7983  |
| linoleic acid (18:2n6)               | 4574.14±725.4 | 5254.04±789.1  | Up         | <0.0001 |
| γ-linolenic Acid (18:3n6)            | 80.212±24.5   | 91.29±28.6     | Up         | <0.0001 |
| eicosadienoic acid (20:2n6)          | 38.87±9.59    | 49.15±10.09    | Up         | <0.0001 |
| di-homo-γ-linolenic Acid (20:3n6)    | 238.18±56.3   | 268.53±58.2    | Up         | <0.0001 |
| arachidonic acid (20:4n6)            | 1081.37±216.2 | 1207.81±236.2  | Up         | <0.0001 |
| docosadienoic acid (22:2n6)          | 1.41±0.60     | 1.60±0.48      | Up         | 0.2269  |
| adrenic acid (22:4n6)                | 37.53±8.24    | 45.22±7.70     | Up         | <0.0001 |
| docosapentaenoic acid (22:5n6)       | 28.78±9.31    | 32.36±10.04    | Up         | <0.0001 |
| α-linolenic acid (18:3n3)            | 95.03±32.38   | 136.67±34.94   | Up         | <0.0001 |
| stearidonic acid (18:4n3)            | 4.82±2.18     | 6.17±2.26      | Up         | <0.0001 |
| icosaotetraenoic acid (20:4n3)       | 12.09±5.38    | 14.98±4.36     | Up         | 0.001   |
| eicosapentaenoic acid (EPA) (20:5n3) | 69.79±24.61   | 80.86±27.91    | Up         | <0.0001 |
| docosapentaenoic acid (DPA) (22:5n3) | 77.76±19.18   | 94.32±21.01    | Up         | <0.0001 |
| docosahexaenoic acid (DHA) (22:6n3)  | 202.66±61.02  | 228.33±67.78   | Up         | <0.0001 |
| plasmalogen (16:0)                   | 41.60±8.01    | 44.47±9.28     | Up         | 0.0003  |
| plasmalogen (18:0)                   | 33.18±8.37    | 35.97±9.41     | Up         | 0.002   |
| plasmalogen (18:1n7)                 | 2.04±0.97     | 2.14±1.02      | Up         | 0.5892  |
| plasmalogen (18:1n9)                 | 9.25±2.51     | 10.32±2.19     | Up         | 0.001   |
| palmitelaidic acid (t16:1n7)         | 53.03±16.37   | 73.26±23.01    | Up         | <0.0001 |
| elaidic acid (t18:1n9)               | 216.25±89.87  | 399.28±125.89  | Up         | <0.0001 |

\*direction of change in concentration of the metabolite after the PPL intervention.

doi:10.1371/journal.pone.0099509.t001



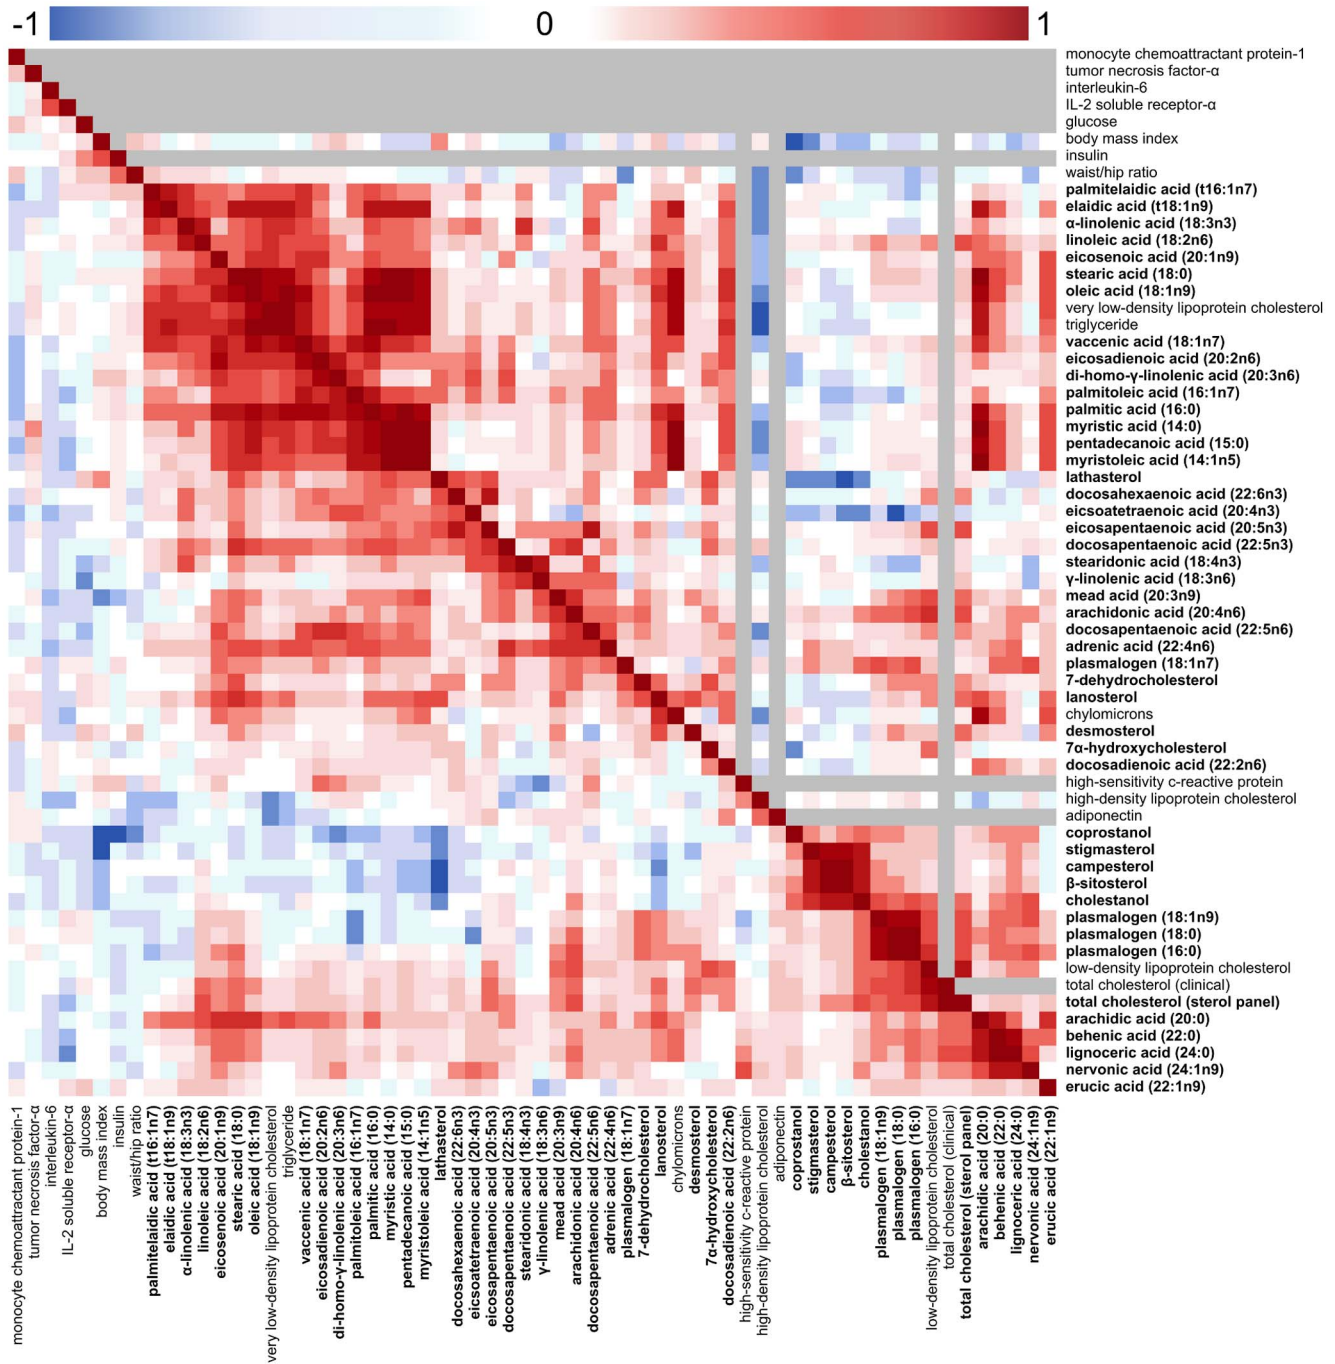

**Figure 1. Data from 40 Genetics of Lipid Lowering Drugs and Diet Network Study participants.** 1a (below the diagonal)-Pairwise correlation of fasting sterols (bold), fatty acids (bold), clinical lipids, inflammatory markers, and other clinical measures. 1b (above the diagonal)-Pairwise correlation of change in postprandial sterols (bold), fatty acids (bold), clinical lipids, and other clinical measures. Grey lines indicate clinical parameters not captured postprandially.  
doi:10.1371/journal.pone.0099509.g001

(cg03758021) with mead acid in the PPARA interacting complex 285 (*PRIC285*) gene.

We explored overlap of EWAS and GWAS results within 20 kb with  $P < 1.0 \times 10^{-4}$  across the genome for each sterol and fatty acid at each time point and evaluated cis-meQTL signals for highlighted regions. Results are presented in Spreadsheet S3. Five regions of EWAS/GWAS overlap were identified for the fasting analysis of sterols and fatty acids including regions on chromo-

somes 1, 11, 16, 19 and 21 for fasting total cholesterol, coprostanol, palmitoleic acid, docosapentaenoic acid, and adrenic acid, respectively, with evidence of moderate to strong cis-meQTL signal ( $5.0 \times 10^{-3} \leq P \leq 5.1 \times 10^{-133}$ ). Consideration of EWAS/GWAS overlap for postprandial models highlighted 10 regions of interest that also consist of many strong cis-meQTL signals. For instance, cg22761176 and cg26817877, located less than 100 bp apart on chromosome 2, were associated with a group of nearby

SNPs with cis-meQTL association significance level ranging from  $P=0.06$  to  $P=2.7*10^{-21}$ .

## Discussion

In the current study we measured the concentration of 11 sterols and 35 fatty acids before and after a PPL challenge in 40 participants from the Genetics of Lipid Lowering Drugs and Diet Network study. We evaluated change in plasma sterols and fatty acids after the challenge, their correlation with other clinical measures in the fasting and postprandial state, and integrated the new lipid phenotypes with existing genomic data. Our findings demonstrate marked response of sterols and fatty acids to the PPL challenge, correlations between clinical lipids and newly measured lipids, and provide proof-of-concept that genomic studies of sterols and fatty acids may reveal new information about pathways important to lipid metabolism and ultimately help identify new biomarkers of CVD risk.

Cholesterol homeostasis, involving the balance between absorption and synthesis, influences circulating plasma lipoprotein concentrations [36,37,38,39,40]. Therefore, several studies have assessed whether cholesterol absorption and synthesis are also associated with prevalent CVD [40]. Results have varied with some studies reporting that higher cholesterol absorption and/or lower cholesterol synthesis is associated with increased [41,42,43,44,45,46,47], decreased [48,49], or no difference in CVD risk [50,51,52]. Because cholesterol absorption and biosynthesis are difficult to measure directly, we measured circulating concentrations of several cholesterol-related sterols as biomarkers of these processes.  $\beta$ -Sitosterol, campesterol, and stigmasterol are plant sterols (phytosterols) similar in structure to cholesterol. Although the absolute amount of phytosterols absorbed in the gut is very low, their plasma concentrations are correlated with cholesterol absorption [53]. Cholestanol, an endogenous 5- $\alpha$ -reduced metabolite of cholesterol, is also correlated with cholesterol absorption [53,54]. Lanosterol, lathosterol, 7-dehydrocholesterol, and desmosterol, are endogenous precursors of cholesterol correlated with cholesterol synthesis [54,55]. Other metabolic products measured in this study include an oxidized derivative of cholesterol, 7 $\alpha$ -hydroxycholesterol, and coprostanol, a dietary cholesterol derivative produced by the intestinal microbiota [56,57,58,59]. Overall, markers of cholesterol absorption significantly increased and markers of cholesterol synthesis decreased 3.5 hours after the high fat meal. Ultimately, a better understanding of the genetic background of these processes can help explain

mechanisms related to postprandial lipemia and even inform future studies relating sterols to CVD risk.

Fatty acid metabolism is also intricately tied to CVD health. Increasing dietary saturated fatty acid intake increases total cholesterol, LDL-C and TG [60,61,62,63]. Subsequently, reduced saturated fatty acid intake has been an important dietary recommendation for the reduction of CVD risk [64]. However, individual saturated fatty acids have unique properties, form a variety of metabolites and, thus, have diverse biological functions [65]. Importantly, not all saturated fatty acids have the same cholesterol-raising effects. For instance, stearic acid has a neutral effect on total cholesterol, LDL-C, and HDL-C, whereas lauric, myristic, and palmitic acids increase total cholesterol, LDL-C, and HDL-C, with myristic acid having the most potent hypercholesterolemic effect [60,66,67]. Due to the complexity of saturated fatty acids in foods, their consumption in the context of other nutrients and sources of error in dietary exposure information, the effect of individual saturated fatty acids on CVD endpoints has varied in the literature [65,68,69,70,71]. An advantage of the study set within GOLDN is that the meal has been standardized and each participant acted as his or her own control. We evaluated saturated fatty acids (myristic acid, pentadecanoic acid, palmitic acid, stearic acid, arachidic acid, behenic acid, and lignoceric acid) and their direct biosynthetic products (myristoleic acid, palmitoleic acid, vaccenic acid, oleic acid, eicosenoic acid, mead acid, erucic acid, and nervonic acid), but also essential fatty acids ( $\alpha$ -linolenic acid, linoleic acid) and their longer, more desaturated derivatives ( $g$ -linolenic acid, eicosadienoic acid, di-homo- $g$ -linolenic acid, arachidonic acid, docosadienoic acid, adrenic acid, docosapentaenoic acid, stearidonic acid, eicosatetraenoic acid, eicosapentaenoic acid, docosapentaenoic acid, and docosahexaenoic acid), 4 plasmalogens and the trans fatty acids elaidic acid and palmitelaidic acids. In our small study, fatty acids present in bovine milk fat [72] (saturated fatty acids- palmitic acid, myristic acid, and stearic acid; mono-unsaturated fatty acid- oleic acid; and trans fatty acids vaccenic acid and elaidic acid) correlated most closely with TG and lipid species that carry TG in response to the PPL challenge. Yet several other fatty acid species (many derivatives of these saturated fatty acids) positively correlated with this group potentially reflecting intrinsic metabolic response to the fat load (e.g. palmitoleic acid, palmitelaidic acid, eicosenoic acid, erucic acid). Importantly, our findings support prior research correlating fatty acids with clinical lipids and provide a unique setting to evaluate the genomic determinants of inter-individual differences in specific fatty acids after a standardized PPL challenge.

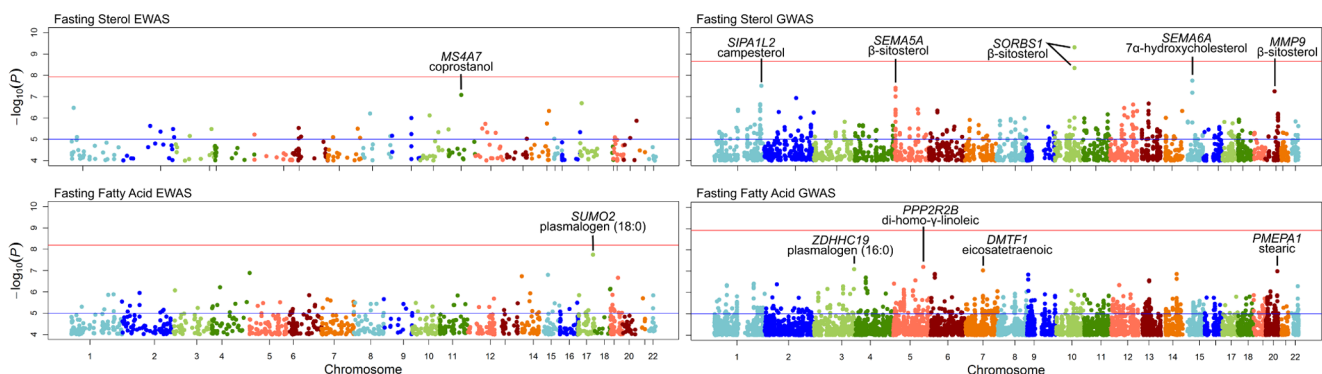

**Figure 2. Manhattan plots for markers with  $P<0.0001$  from epigenome-wide association study and genome-wide association study.** Phenotypes include 11 sterols and 35 fatty acids measured at fasting. doi:10.1371/journal.pone.0099509.g002

**Table 2.** Top genome-wide association study (GWAS) and epigenome-wide association study (EWAS) results for fasting sterols and fatty acids.

| Marker             | Chr | Location  | Lipid                       | Gene           | Gene Proximity  | P-value               |
|--------------------|-----|-----------|-----------------------------|----------------|-----------------|-----------------------|
| <i>Sterol GWAS</i> |     |           |                             |                |                 |                       |
| rs12247017         | 10  | 97270729  | b-sitosterol                | <i>SORBS1</i>  | intronic        | 4.9*10 <sup>-10</sup> |
| rs12240292         | 10  | 97273066  | b-sitosterol                | <i>SORBS1</i>  | intronic        | 4.5*10 <sup>-10</sup> |
| rs12772243         | 10  | 97295589  | b-sitosterol                | <i>SORBS1</i>  | intronic        | 4.5*10 <sup>-9</sup>  |
| rs12776555         | 10  | 97284362  | b-sitosterol                | <i>SORBS1</i>  | intronic        | 4.5*10 <sup>-9</sup>  |
| rs4918944          | 10  | 97283881  | b-sitosterol                | <i>SORBS1</i>  | intronic        | 4.5*10 <sup>-9</sup>  |
| rs281282           | 15  | 47679257  | 7a-hydroxycholesterol       | <i>SEMA6D</i>  | intronic        | 1.8*10 <sup>-8</sup>  |
| rs281284           | 15  | 47680407  | 7a-hydroxycholesterol       | <i>SEMA6D</i>  | intronic        | 1.8*10 <sup>-8</sup>  |
| rs281294           | 15  | 47683646  | 7a-hydroxycholesterol       | <i>SEMA6D</i>  | intronic        | 1.8*10 <sup>-8</sup>  |
| rs1631842          | 1   | 232447391 | campesterol                 | <i>SIPA1L2</i> | ~100kb upstream | 3.1*10 <sup>-8</sup>  |
| rs1766581          | 1   | 232447293 | campesterol                 | <i>SIPA1L2</i> | ~100kb upstream | 3.1*10 <sup>-8</sup>  |
| rs10059341         | 5   | 9325205   | b-sitosterol                | <i>SEMA5A</i>  | intronic        | 3.9*10 <sup>-8</sup>  |
| rs10065505         | 5   | 9301719   | b-sitosterol                | <i>SEMA5A</i>  | intronic        | 3.9*10 <sup>-8</sup>  |
| rs13360783         | 5   | 9299238   | b-sitosterol                | <i>SEMA5A</i>  | intronic        | 3.9*10 <sup>-8</sup>  |
| rs1557879          | 5   | 9308539   | b-sitosterol                | <i>SEMA5A</i>  | intronic        | 3.9*10 <sup>-8</sup>  |
| rs3777306          | 5   | 9295681   | b-sitosterol                | <i>SEMA5A</i>  | intronic        | 3.9*10 <sup>-8</sup>  |
| rs3777311          | 5   | 9301324   | b-sitosterol                | <i>SEMA5A</i>  | intronic        | 3.9*10 <sup>-8</sup>  |
| rs3777312          | 5   | 9301496   | b-sitosterol                | <i>SEMA5A</i>  | intronic        | 3.9*10 <sup>-8</sup>  |
| rs3777316          | 5   | 9302667   | b-sitosterol                | <i>SEMA5A</i>  | intronic        | 3.9*10 <sup>-8</sup>  |
| rs3777320          | 5   | 9307427   | b-sitosterol                | <i>SEMA5A</i>  | intronic        | 3.9*10 <sup>-8</sup>  |
| rs3777325          | 5   | 9319778   | b-sitosterol                | <i>SEMA5A</i>  | intronic        | 3.9*10 <sup>-8</sup>  |
| rs3777327          | 5   | 9323467   | b-sitosterol                | <i>SEMA5A</i>  | intronic        | 3.9*10 <sup>-8</sup>  |
| rs3797980          | 5   | 9328316   | b-sitosterol                | <i>SEMA5A</i>  | intronic        | 3.9*10 <sup>-8</sup>  |
| rs17196572         | 5   | 9298117   | b-sitosterol                | <i>SEMA5A</i>  | intronic        | 4.7*10 <sup>-8</sup>  |
| rs3918278          | 20  | 44635654  | b-sitosterol                | <i>MMP9</i>    | ~2k bupstream   | 5.6*10 <sup>-8</sup>  |
| rs11070582         | 15  | 47686590  | 7a-hydroxycholesterol       | <i>SEMA6D</i>  | intronic        | 6.5*10 <sup>-8</sup>  |
| rs3822789          | 5   | 9322477   | b-sitosterol                | <i>SEMA5A</i>  | intronic        | 9.8*10 <sup>-8</sup>  |
| rs697651           | 2   | 155323278 | 7-dehydrocholesterol        | <i>GALNT13</i> | downstream      | 1.2*10 <sup>-7</sup>  |
| <i>Sterol EWAS</i> |     |           |                             |                |                 |                       |
| cg02621636         | 11  | 60161999  | coprostanol                 | <i>MS4A7</i>   | in 3'utr        | 8.3*10 <sup>-8</sup>  |
| <i>FA GWAS</i>     |     |           |                             |                |                 |                       |
| rs6895471          | 5   | 146472853 | di-homo- $\gamma$ -linoleic | <i>PPP2R2B</i> | ~10kb upstream  | 6.3*10 <sup>-8</sup>  |
| rs17105882         | 5   | 146465362 | di-homo- $\gamma$ -linoleic | <i>PPP2R2B</i> | ~10kb upstream  | 6.3*10 <sup>-8</sup>  |
| rs6795707          | 3   | 195937410 | plasmalogen (16:0)          | <i>ZDHHC19</i> | intronic        | 8.0*10 <sup>-8</sup>  |
| rs1859124          | 7   | 86747876  | eicsoatetraenoic            | <i>DMTF1</i>   | ~50 kb upstream | 9.2*10 <sup>-8</sup>  |
| rs8118851          | 20  | 56292879  | stearic                     | <i>PMEPA1</i>  | ~10 kb upstream | 1.0*10 <sup>-7</sup>  |
| <i>FA EWAS</i>     |     |           |                             |                |                 |                       |
| cg23221506         | 17  | 73175571  | plasmalogen (18:0)          | <i>SUMO2</i>   | intron          | 1.8*10 <sup>-8</sup>  |

Chr, chromosome; FA, fatty acid.

doi:10.1371/journal.pone.0099509.t002

GWAS and EWAS of fasting sterol and fatty acid concentrations highlighted several regions of interest with biologically plausible association. A cluster of SNPs on chromosome 10 associated with b-sitosterol is located in *SORBS1*, which encodes a protein in the insulin signaling pathway [73]. Insulin resistance has been linked to high cholesterol synthesis and decreased cholesterol absorption in prior reports [54,74,75]. Further studies are needed to determine if variation in *SORBS1* may help explain such observations. SNPs in *SEMA6D* and *SEMA5A* were highlighted as being associated with fasting 7a-hydroxycholesterol and

b-sitosterol, respectively. Semaphorins have important regulatory functions in the cardiac, circulatory and immune systems [76,77,78,79,80]. For instance, *SEMA6D* has been linked to T-cell activation [81] and *SEMA5A* promotes angiogenesis through increased endothelial cell proliferation, migration, and downregulated apoptosis [82]. *SEMA5A* action may be facilitated by *MMP9*, another gene reported as being associated with b-sitosterol in Table 2 [82]. *MMP9* has been indicated in vascular injury, inflammation, and tissue remodeling associated with CVD [83,84,85,86]. A CpG in the 3'UTR of *MS4A7* was associated



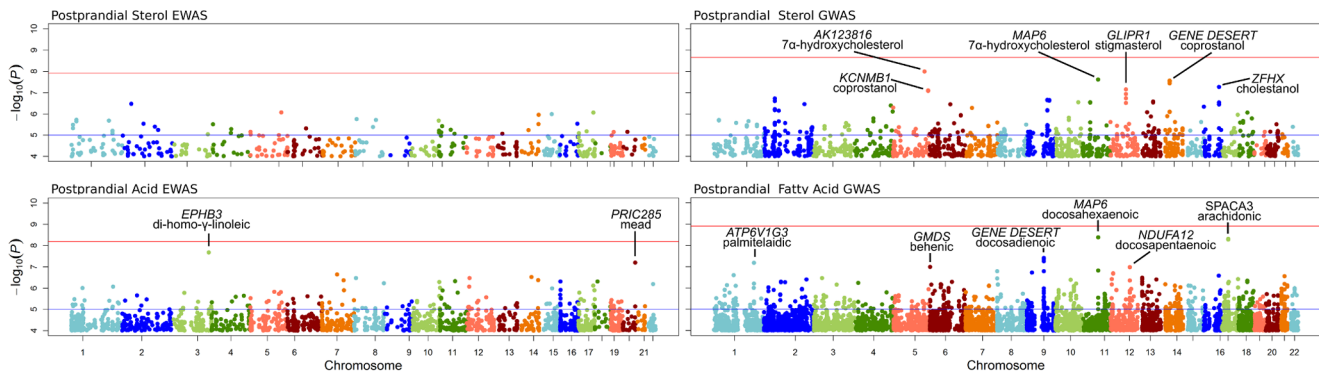

**Figure 3. Manhattan plots for markers with  $P < 0.0001$  from epigenome-wide association study and genome-wide association study.** Phenotypes include 11 postprandial sterols and 35 postprandial fatty acids after adjustment for fasting concentration. doi:10.1371/journal.pone.0099509.g003

**Table 3. Top genome-wide association study (GWAS) and epigenome-wide association study (EWAS) results for postprandial sterols and fatty acids.**

| Marker             | Chr | Location  | Lipid                       | Gene     | Gene Proximity     | P-value              |
|--------------------|-----|-----------|-----------------------------|----------|--------------------|----------------------|
| <i>Sterol GWAS</i> |     |           |                             |          |                    |                      |
| rs17490390         | 5   | 152362706 | 7a-hydroxycholesterol       | AK123816 | ~10 kb downstream  | $1.0 \times 10^{-8}$ |
| rs666566           | 11  | 75302420  | 7a-hydroxycholesterol       | MAP6     | intronic           | $2.4 \times 10^{-8}$ |
| rs1627411          | 14  | 43171328  | coprostanol                 | -        | -                  | $2.7 \times 10^{-8}$ |
| rs1698533          | 14  | 43172278  | coprostanol                 | -        | -                  | $2.8 \times 10^{-8}$ |
| rs1698534          | 14  | 43172343  | coprostanol                 | -        | -                  | $2.8 \times 10^{-8}$ |
| rs1712738          | 14  | 43163097  | coprostanol                 | -        | -                  | $3.0 \times 10^{-8}$ |
| rs1627270          | 14  | 43168725  | coprostanol                 | -        | -                  | $3.6 \times 10^{-8}$ |
| rs7203768          | 16  | 73301302  | cholestanol                 | ZFH3     | ~200 kb downstream | $5.4 \times 10^{-8}$ |
| rs12826237         | 12  | 76073557  | stigmasterol                | GLIPR1   | ~100 kb downstream | $7.0 \times 10^{-8}$ |
| rs314112           | 5   | 169813739 | coprostanol                 | KCNMB1   | intronic           | $7.8 \times 10^{-8}$ |
| rs314111           | 5   | 169813844 | coprostanol                 | KCNMB1   | intronic           | $8.1 \times 10^{-8}$ |
| rs314113           | 5   | 169813296 | coprostanol                 | KCNMB1   | intronic           | $8.1 \times 10^{-8}$ |
| rs314109           | 5   | 169814432 | coprostanol                 | KCNMB1   | intronic           | $8.2 \times 10^{-8}$ |
| rs17223072         | 12  | 76080856  | stigmasterol                | GLIPR1   | ~100kb downstream  | $1.1 \times 10^{-7}$ |
| <i>FA GWAS</i>     |     |           |                             |          |                    |                      |
| rs666566           | 11  | 75302420  | docosahexaenoic             | MAP6     | intronic           | $4.1 \times 10^{-9}$ |
| rs757079           | 17  | 31325103  | arachidonic                 | SPACA3   | ~0.2kb downstream  | $4.9 \times 10^{-9}$ |
| rs28958            | 17  | 31324657  | arachidonic                 | SPACA3   | intronic           | $5.3 \times 10^{-9}$ |
| rs13285452         | 9   | 83595061  | docosadienoic               | -        | -                  | $3.9 \times 10^{-8}$ |
| rs7025679          | 9   | 83513137  | docosadienoic               | -        | -                  | $4.1 \times 10^{-8}$ |
| rs7350230          | 9   | 83572513  | docosadienoic               | -        | -                  | $4.5 \times 10^{-8}$ |
| rs7024926          | 9   | 83576272  | docosadienoic               | -        | -                  | $5.5 \times 10^{-8}$ |
| rs16843235         | 1   | 198485694 | palmitelaidic               | ATP6V1G3 | ~10 kb upstream    | $6.5 \times 10^{-8}$ |
| rs9503012          | 6   | 1707004   | behenic                     | GMDS     | intronic           | $1.0 \times 10^{-7}$ |
| rs1628439          | 12  | 95400638  | docosapentaenoic            | NDUFA12  | ~5 kb downstream   | $1.0 \times 10^{-7}$ |
| <i>FA EWAS</i>     |     |           |                             |          |                    |                      |
| cg15718583         | 3   | 184231385 | di-homo- $\gamma$ -linoleic | EPHB3    | ~50 kb upstream    | $2.1 \times 10^{-8}$ |
| cg03758021         | 20  | 62208140  | mead                        | PRIC285  | ~5 kb downstream   | $6.3 \times 10^{-8}$ |

Chr, chromosome; FA, fatty acid.  
doi:10.1371/journal.pone.0099509.t003

with coprostanol. *MS4A7* encodes a member of the membrane-spanning 4A gene family, localized to chromosome 11q12, in a cluster of other family members. *MS4A7* is expressed in lymphocytes and is likely involved in signal transduction [87]. SNPs upstream of *PPP2R2B* were associated with DGLA, an n-6 polyunsaturated fatty acid (PUFA). *PPP2R2B* encodes a brain specific regulatory subunit of a protein phosphatase that is not easily relatable to CVD and lipid metabolism. However, a recent report that fine-mapped a large region on chromosome 5q31-33 for early onset coronary artery disease (CAD) across two large family studies identified *PPP2R2B* as one of four genes that showed consistent and strong association with both LDL-C and CAD [88].

After adjusting for fasting concentration, GWAS and EWAS of individual PPL sterol and fatty acid concentrations also yielded unique results in or near genes with compelling biological significance to lipid metabolism and CVD. *ZFHX3* is a transcription factor with cardiac and immune cell expression. Though our signal for cholesterol is much farther downstream, SNPs in *ZFHX3* have been linked to stroke and atrial fibrillation in prior GWAS [89,90,91]. GLI pathogenesis-related 1 (*GLIPR1*) may be linked immune cell function as the gene is highly expressed in multiple immune cell types [92]. Calcium activated K<sup>+</sup> channels (KCa) have an essential role in arterial function regulating vascular tone [93]. Our study highlights SNPs in *KCNMB1* (encoding a KCa subunit) which were associated with postprandial coprostanol. Previous research has linked mutations in *KCNMB1* to hypertension, myocardial infarction and stroke [94]. Additionally, increased expression of vascular KCa channels have been demonstrated in coronary vessels from patients with CAD [95]. GDP-mannose-4,6-dehydratase (GMDS), highlighted for association with behenic acid, is regulator of post-translational modification processes important for cell surface lipids and proteins [96]. Other genes annotated in GWAS are more difficult to link to postprandial lipid metabolism. For instance, MAP6 is involved in microtubule stabilization in many cell types, and sperm acrosome associated 3 (SPACA3) is a sperm surface membrane protein [92,97,98]. Finally, fatty acid EWAS results highlight a marker (cg03758021) closely downstream of *PRIC285*, a nuclear co-activator of the transcription factor PPARA which is intricately involved in inflammation and lipid metabolism in the liver [99,100].

In addition to evaluating the most significant EWAS and GWAS results in this study we mined all results presented in Spreadsheets S1 and S2 for postprandial lipemia and cardiovascular risk loci published in the literature [2,10,11,101]. A SNP (rs219562) near *APOB* was associated with postprandial stigmastanol ( $P=6.0 \times 10^{-5}$ ) and a CpG (cg20691580) in *APOC3* was associated with postprandial palmitelaidic acid ( $P=3.0 \times 10^{-5}$ ). *APOB* and *APOC3* have been associated with postprandial clinical lipids [2]. Additionally, CpGs in *WDR12* and *SH2B3*, respectively, were found in Spreadsheet S1 among the fasting fatty acid EWAS results. Finally, a SNP (rs11239204) near *CXCL12* was associated ( $P=1.8 \times 10^{-5}$ ) with postprandial plasmalogen 18:1n9 concentration. *WDR12*, *SH2B3* and *CXCL12* were among 13 loci highlighted in a large GWAS of CAD [101]. Though none of these findings meet criteria for statistical significance after correction for multiple testing, they support the potential usefulness of lipidomic studies in unraveling biological mechanisms by which genes relate to more complex CVD phenotypes.

We also explored the potential to integrate EWAS and GWAS results from these analyses. Taking a regionalized approach our results demonstrate several examples of within phenotype EWAS/

GWAS overlap in both fasting and postprandial models. In the future, we hope to have data from a larger sample in GOLDN that will enable us to model SNPs and CpG sites (fitting criteria as cis-meQTLs) jointly on a phenotype to better deduce interplay among markers. While our small sample restricted the pursuit of these additional analyses, our data demonstrate the potential for functional crosstalk between genomic layers supporting further expansion of this research set within GOLDN.

We note several limitations to our study. Most importantly, our sample size was small for the high dimensional data analyses pursued. Therefore, it was difficult to identify markers meeting the strict criteria necessary to achieve statistical significance in the context of this study. Consequently, some false positive and alternatively, false negative findings may have occurred. Replication in a larger group from GOLDN and external cohorts is needed. Still, we present novel research that highlights the potential of integrating ‘omic’ data to make progress in the field of translational research and personalized medicine in the context of an altered postprandial lipid response.

To our knowledge, this is the first study evaluating the lipid response to a PPL challenge with fine resolution of phenotypes via lipidomic assays. Additionally, a new dimension to the study of postprandial lipemia was explored by integrating GWAS and EWAS data with the lipidomic measurements. Our study highlighted several novel genes involved in lipid metabolism, endothelial function, immune function and cell signaling. Overall, the results demonstrate that small molecule lipids correlate with clinical lipids, respond to the PPL intervention, and that genomic markers might help unravel mechanisms related to lipid metabolism in the fasting and non-fasting state. This report sets the groundwork to expand this research in GOLDN and other cohorts to help translate novel biomarkers of the postprandial lipid response to use in the diagnosis, prevention and treatment of dyslipidemias and CVD.

## Supporting Information

**Table S1 Clinical variables measured at fasting and 3.5 hours after the postprandial lipemia challenge in 40 Genetics of Lipid Lowering Drugs and Diet Network (GOLDN) study participants.**

(PDF)

**Spreadsheet S1 Complete list of all CpGs and SNPs (including annotations) shown in Figure 2.**

(XLS)

**Spreadsheet S2 Complete list of all CpGs and SNPs (including annotations) shown in Figure 3.**

(XLS)

**Spreadsheet S3 cis-MeQTL association in regions of EWAS/GWAS overlap.**

(XLSX)

## Author Contributions

Conceived and designed the experiments: MRI DZ DMA JMO DKA. Performed the experiments: DMA SMW. Analyzed the data: MRI DZ. Wrote the paper: MRI DZ. Critically revised manuscript for important intellectual content: MRI DZ SA SAC HKT DKA. Made final approval of manuscript: DMA JMO HKT SMW DKA.

## References

- Sarwar N, Danesh J, Eiriksdottir G, Sigurdsson G, Wareham N, et al. (2007) Triglycerides and the risk of coronary heart disease: 10,158 incident cases among 262,525 participants in 29 Western prospective studies. *Circulation* 115: 450–458.
- Lopez-Miranda J, Williams C, Lairon D (2007) Dietary, physiological, genetic and pathological influences on postprandial lipid metabolism. *Br J Nutr* 98: 458–473.
- Mora S, Rifai N, Buring JE, Ridker PM (2008) Fasting compared with nonfasting lipids and apolipoproteins for predicting incident cardiovascular events. *Circulation* 118: 993–1001.
- Stampfer MJ, Krauss RM, Ma J, Blanche PJ, Holl LG, et al. (1996) A prospective study of triglyceride level, low-density lipoprotein particle diameter, and risk of myocardial infarction. *Jama* 276: 882–888.
- Nordstgaard BG, Benn M, Schnohr P, Tybjaerg-Hansen A (2007) Nonfasting triglycerides and risk of myocardial infarction, ischemic heart disease, and death in men and women. *Jama* 298: 299–308.
- Langsted A, Freiberg JJ, Tybjaerg-Hansen A, Schnohr P, Jensen GB, et al. (2011) Nonfasting cholesterol and triglycerides and association with risk of myocardial infarction and total mortality: the Copenhagen City Heart Study with 31 years of follow-up. *J Intern Med* 270: 65–75.
- Uiterwaal CS, Grobbee DE, Wittman JC, van Stiphout WA, Krauss XH, et al. (1994) Postprandial triglyceride response in young adult men and familial risk for coronary atherosclerosis. *Ann Intern Med* 121: 576–583.
- Tiret L, Gerdes C, Murphy MJ, Dallongeville J, Nicaud V, et al. (2000) Postprandial response to a fat tolerance test in young adults with a paternal history of premature coronary heart disease - the EARS II study (European Atherosclerosis Research Study). *Eur J Clin Invest* 30: 578–585.
- Chapman MJ, Ginsberg HN, Amarenco P, Andreotti F, Boren J, et al. (2011) Triglyceride-rich lipoproteins and high-density lipoprotein cholesterol in patients at high risk of cardiovascular disease: evidence and guidance for management. *Eur Heart J* 32: 1345–1361.
- Perez-Martinez P, Corella D, Shen J, Arnett DK, Yiannakouris N, et al. (2009) Association between glucokinase regulatory protein (GCKR) and apolipoprotein A5 (APOA5) gene polymorphisms and triacylglycerol concentrations in fasting, postprandial, and fenofibrate-treated states. *Am J Clin Nutr* 89: 391–399.
- Shen H, Pollin TI, Damcott CM, McLenithan JC, Mitchell BD, et al. (2009) Glucokinase regulatory protein gene polymorphism affects postprandial lipemic response in a dietary intervention study. *Hum Genet* 126: 567–574.
- Shah SH, Hauser ER, Bain JR, Muehlbauer MJ, Haynes C, et al. (2009) High heritability of metabolomic profiles in families burdened with premature cardiovascular disease. *Mol Syst Biol* 5: 258.
- Hicks AA, Pramstaller PP, Johansson A, Vitart V, Rudan I, et al. (2009) Genetic determinants of circulating sphingolipid concentrations in European populations. *PLoS Genet* 5: e1000672.
- Rhee EP, Gerszten RE (2012) Metabolomics and cardiovascular biomarker discovery. *Clin Chem* 58: 139–147.
- Bell JT, Pai AA, Pickrell JK, Gaffney DJ, Pique-Regi R, et al. (2011) DNA methylation patterns associate with genetic and gene expression variation in HapMap cell lines. *Genome Biol* 12: R10.
- Corella D, Arnett DK, Tsai MY, Kabagambe EK, Peacock JM, et al. (2007) The -256T>C polymorphism in the apolipoprotein A-II gene promoter is associated with body mass index and food intake in the genetics of lipid lowering drugs and diet network study. *Clin Chem* 53: 1144–1152.
- Irvin MR, Kabagambe EK, Tiwari HK, Parnell LD, Straka RJ, et al. (2010) Apolipoprotein E polymorphisms and postprandial triglyceridemia before and after fenofibrate treatment in the Genetics of Lipid Lowering and Diet Network (GOLDN) Study. *Circ Cardiovasc Genet* 3: 462–467.
- Patsch JR, Miesenbock G, Hopferwieser T, Muhlberger V, Knapp E, et al. (1992) Relation of triglyceride metabolism and coronary artery disease. Studies in the postprandial state. *Arterioscler Thromb* 12: 1336–1345.
- Kabagambe EK, Ordovas JM, Tsai MY, Borecki IB, Hopkins PN, et al. (2009) Smoking, inflammatory patterns and postprandial hypertriglyceridemia. *Atherosclerosis* 203: 633–639.
- Aslibekyan S, Kabagambe EK, Irvin MR, Straka RJ, Borecki IB, et al. (2012) A genome-wide association study of inflammatory biomarker changes in response to fenofibrate treatment in the Genetics of Lipid Lowering Drug and Diet Network. *Pharmacogenet Genomics* 22: 191–197.
- Folch J, Lees M, Sloane Stanley GH (1957) A simple method for the isolation and purification of total lipides from animal tissues. *J Biol Chem* 226: 497–509.
- Korn JM, Kuruvilla FG, McCarrroll SA, Wysoker A, Nemesh J, et al. (2008) Integrated genotype calling and association analysis of SNPs, common copy number polymorphisms and rare CNVs. *Nat Genet* 40: 1253–1260.
- Bouwens M, Afman LA, Muller M (2007) Fasting induces changes in peripheral blood mononuclear cell gene expression profiles related to increases in fatty acid beta-oxidation: functional role of peroxisome proliferator activated receptor alpha in human peripheral blood mononuclear cells. *Am J Clin Nutr* 86: 1515–1523.
- Bouwens M, Afman LA, Muller M (2008) Activation of peroxisome proliferator-activated receptor alpha in human peripheral blood mononuclear cells reveals an individual gene expression profile response. *BMC Genomics* 9: 262.
- Chinetti G, Griglio S, Antonucci M, Torra IP, Delerive P, et al. (1998) Activation of proliferator-activated receptors alpha and gamma induces apoptosis of human monocyte-derived macrophages. *J Biol Chem* 273: 25573–25580.
- Neurauter AA, Bonyhadi M, Lien E, Nøkleby L, Ruud E, et al. (2007) Cell isolation and expansion using Dynabeads. *Adv Biochem Eng Biotechnol* 106: 41–73.
- Sandoval J, Heyn H, Moran S, Serra-Musach J, Pujana MA, et al. (2011) Validation of a DNA methylation microarray for 450,000 CpG sites in the human genome. *Epigenetics* 6: 692–702.
- Absher DM, Li X, Waite LL, Gibson A, Roberts K, et al. (2013) Genome-wide DNA methylation analysis of systemic lupus erythematosus reveals persistent hypomethylation of interferon genes and compositional changes to CD4+ T-cell populations. *PLoS Genet* 9: e1003678.
- Adalsteinsson BT, Gudnason H, Asplund T, Harris TB, Launer LJ, et al. (2012) Heterogeneity in white blood cells has potential to confound DNA methylation measurements. *PLoS ONE* 7: e46705.
- Warnes GR, Bolker B, Bonebakker L, Gentleman R, Liaw WHA, et al. (2014) gplots: Various R programming tools for plotting data. 1.12.1 ed.
- Aslibekyan S, An P, Frazier-Wood AC, Kabagambe EK, Irvin MR, et al. (2012) Preliminary evidence of genetic determinants of adiponectin response to fenofibrate in the Genetics of Lipid Lowering Drugs and Diet Network. *Nutr Metab Cardiovasc Dis*.
- Lourenco VM, Pires AM, Kirst M (2011) Robust linear regression methods in association studies. *Bioinformatics* 27: 815–821.
- Li J, Ji L (2005) Adjusting multiple testing in multilocus analyses using the eigenvalues of a correlation matrix. *Heredity (Edinb)* 95: 221–227.
- Pevsner J (2009) Analysis of genomic DNA with the UCSC genome browser. *Methods Mol Biol* 537: 277–301.
- Wang K, Li M, Hakonarson H (2010) ANNOVAR: functional annotation of genetic variants from high-throughput sequencing data. *Nucleic Acids Res* 38: e164.
- Matthan NR, Zhu L, Pencina M, D'Agostino RB, Schaefer EJ, et al. (2013) Sex-specific differences in the predictive value of cholesterol homeostasis markers and 10-year cardiovascular disease event rate in framingham offspring study participants. *J Am Heart Assoc* 2: e005066.
- Cuchel M, Schaefer EJ, Millar JS, Jones PJ, Dolnikowski GG, et al. (1997) Lovastatin decreases de novo cholesterol synthesis and LDL Apo B-100 production rates in combined-hyperlipidemic males. *Arterioscler Thromb Vasc Biol* 17: 1910–1917.
- Miettinen TA (2001) Cholesterol absorption inhibition: a strategy for cholesterol-lowering therapy. *Int J Clin Pract* 55: 710–716.
- Kesaniemi YA, Ehnholm C, Miettinen TA (1987) Intestinal cholesterol absorption efficiency in man is related to apolipoprotein E phenotype. *J Clin Invest* 80: 578–581.
- Matthan NR, Resteghini N, Robertson M, Ford I, Shepherd J, et al. (2010) Cholesterol absorption and synthesis markers in individuals with and without a CHD event during pravastatin therapy: insights from the PROSPER trial. *J Lipid Res* 51: 202–209.
- Matthan NR, Pencina M, LaRocque JM, Jacques PF, D'Agostino RB, et al. (2009) Alterations in cholesterol absorption/synthesis markers characterize Framingham offspring study participants with CHD. *J Lipid Res* 50: 1927–1935.
- Weingartner O, Pinsdorf T, Rogacev KS, Blomer L, Grenner Y, et al. (2010) The relationships of markers of cholesterol homeostasis with carotid intima-media thickness. *PLoS ONE* 5: e13467.
- Silbernegel G, Fauler G, Hoffmann MM, Lutjohann D, Winkelmann BR, et al. (2010) The associations of cholesterol metabolism and plasma plant sterols with all-cause and cardiovascular mortality. *J Lipid Res* 51: 2384–2393.
- Gylling H, Hallikainen M, Rajaratnam RA, Simonen P, Pihlajamaki J, et al. (2009) The metabolism of plant sterols is disturbed in postmenopausal women with coronary artery disease. *Metabolism* 58: 401–407.
- Assmann G, Cullen P, Erbey J, Ramey DR, Kannenberg F, et al. (2006) Plasma sitosterol elevations are associated with an increased incidence of coronary events in men: results of a nested case-control analysis of the Prospective Cardiovascular Munster (PROCAM) study. *Nutr Metab Cardiovasc Dis* 16: 13–21.
- Rajaratnam RA, Gylling H, Miettinen TA (2000) Independent association of serum squalene and noncholesterol sterols with coronary artery disease in postmenopausal women. *J Am Coll Cardiol* 35: 1185–1191.
- Sudhopt T, Gottwald BM, von Bergmann K (2002) Serum plant sterols as a potential risk factor for coronary heart disease. *Metabolism* 51: 1519–1521.
- Escurriol V, Cofan M, Moreno-Iribas C, Larranaga N, Martinez C, et al. (2010) Phytosterol plasma concentrations and coronary heart disease in the prospective Spanish EPIC cohort. *J Lipid Res* 51: 618–624.
- Fassbender K, Lutjohann D, Dik MG, Bremmer M, König J, et al. (2008) Moderately elevated plant sterol levels are associated with reduced cardiovascular risk—the LASA study. *Atherosclerosis* 196: 283–288.

50. Pinedo S, Vissers MN, von Bergmann K, Elharchaoui K, Lutjohann D, et al. (2007) Plasma levels of plant sterols and the risk of coronary artery disease: the prospective EPIC-Norfolk Population Study. *J Lipid Res* 48: 139–144.
51. Wilund KR, Yu L, Xu F, Vega GL, Grundy SM, et al. (2004) No association between plasma levels of plant sterols and atherosclerosis in mice and men. *Arterioscler Thromb Vasc Biol* 24: 2326–2332.
52. Windler E, Zyriax BC, Kuipers F, Linseisen J, Boeing H (2009) Association of plasma phytosterol concentrations with incident coronary heart disease Data from the CORA study, a case-control study of coronary artery disease in women. *Atherosclerosis* 203: 284–290.
53. Ostlund RE Jr, McGill JB, Zeng CM, Covey DF, Stearns J, et al. (2002) Gastrointestinal absorption and plasma kinetics of soy Delta(5)-phytosterols and phytosterols in humans. *Am J Physiol Endocrinol Metab* 282: E911–916.
54. Pihlajamaki J, Gylling H, Miettinen TA, Laakso M (2004) Insulin resistance is associated with increased cholesterol synthesis and decreased cholesterol absorption in normoglycemic men. *J Lipid Res* 45: 507–512.
55. Miettinen TA, Tilvis RS, Kesaniemi YA (1990) Serum plant sterols and cholesterol precursors reflect cholesterol absorption and synthesis in volunteers of a randomly selected male population. *Am J Epidemiol* 131: 20–31.
56. Benno P, Midtvedt K, Alam M, Collinder E, Norin E, et al. (2005) Examination of intestinal conversion of cholesterol to coprostanol in 633 healthy subjects reveals an age- and sex-dependent pattern. *Microb Ecol Health Dis* 17: 200–204.
57. Poli G, Sottero B, Gargiulo S, Leonarduzzi G (2009) Cholesterol oxidation products in the vascular remodeling due to atherosclerosis. *Mol Aspects Med* 30: 180–189.
58. Brown AJ, Jessup W (1999) Oxysterols and atherosclerosis. *Atherosclerosis* 142: 1–28.
59. Shentu TP, Singh DK, Oh MJ, Sun S, Sadaat L, et al. (2012) The role of oxysterols in control of endothelial stiffness. *J Lipid Res* 53: 1348–1358.
60. Micha R, Mozaffarian D (2010) Saturated fat and cardiometabolic risk factors, coronary heart disease, stroke, and diabetes: a fresh look at the evidence. *Lipids* 45: 893–905.
61. Korani M, Firoozrai M, Maleki J, Ghahramanpour F, Heidari I, et al. (2012) Fatty acid composition of serum lipids in patients with type 2 diabetes. *Clin Lab* 58: 1283–1291.
62. Lopez-Alvarenga JC, Ebbesson SO, Ebbesson LO, Tejero ME, Voruganti VS, et al. (2010) Polyunsaturated fatty acids effect on serum triglycerides concentration in the presence of metabolic syndrome components. The Alaska-Siberia Project. *Metabolism* 59: 86–92.
63. Keys A, Anderson JT, Grande F (1965) Serum cholesterol response to changes in the diet: IV. Particular saturated fatty acids in the diet. *Metabolism* 14: 776–786.
64. Astrup A, Dyerberg J, Elwood P, Hermansen K, Hu FB, et al. (2011) The role of reducing intakes of saturated fat in the prevention of cardiovascular disease: where does the evidence stand in 2010? *Am J Clin Nutr* 93: 684–688.
65. Flock MR, Kris-Etherton PM (2013) Diverse physiological effects of long-chain saturated fatty acids: implications for cardiovascular disease. *Curr Opin Clin Nutr Metab Care* 16: 133–140.
66. Mensink RP, Zock PL, Kester AD, Katan MB (2003) Effects of dietary fatty acids and carbohydrates on the ratio of serum total to HDL cholesterol and on serum lipids and apolipoproteins: a meta-analysis of 60 controlled trials. *Am J Clin Nutr* 77: 1146–1155.
67. Hunter JE, Zhang J, Kris-Etherton PM (2010) Cardiovascular disease risk of dietary stearic acid compared with trans, other saturated, and unsaturated fatty acids: a systematic review. *Am J Clin Nutr* 91: 46–63.
68. van Meijl LE, Vrolix R, Mensink RP (2008) Dairy product consumption and the metabolic syndrome. *Nutr Res Rev* 21: 148–157.
69. Biong AS, Muller H, Seljelot I, Veierod MB, Pedersen JI (2004) A comparison of the effects of cheese and butter on serum lipids, haemostatic variables and homocysteine. *Br J Nutr* 92: 791–797.
70. Tholstrup T, Hoy CE, Andersen LN, Christensen RD, Sandstrom B (2004) Does fat in milk, butter and cheese affect blood lipids and cholesterol differently? *J Am Coll Nutr* 23: 169–176.
71. Nestel PJ, Chronopoulos A, Cehun M (2005) Dairy fat in cheese raises LDL cholesterol less than that in butter in mildly hypercholesterolaemic subjects. *Eur J Clin Nutr* 59: 1059–1063.
72. O'Donnell-Megarao AM, Barbano DM, Bauman DE (2011) Survey of the fatty acid composition of retail milk in the United States including regional and seasonal variations. *J Dairy Sci* 94: 59–65.
73. Yang WS, Lee WJ, Huang KC, Lee KC, Chao CL, et al. (2003) mRNA levels of the insulin-signaling molecule SORBS1 in the adipose depots of nondiabetic women. *Obes Res* 11: 586–590.
74. Stranberg TE, Salomaa V, Vanhanen H, Miettinen TA (1996) Associations of fasting blood glucose with cholesterol absorption and synthesis in nondiabetic middle-aged men. *Diabetes* 45: 755–761.
75. Simonen P, Gylling H, Howard AN, Miettinen TA (2000) Introducing a new component of the metabolic syndrome: low cholesterol absorption. *Am J Clin Nutr* 72: 82–88.
76. Kikutani H, Kumanogoh A (2003) Semaphorins in interactions between T cells and antigen-presenting cells. *Nat Rev Immunol* 3: 159–167.
77. Liu BP, Strittmatter SM (2001) Semaphorin-mediated axonal guidance via Rho-related G proteins. *Curr Opin Cell Biol* 13: 619–626.
78. Tamagnone L, Artigiani S, Chen H, He Z, Ming GL, et al. (1999) Plexins are a large family of receptors for transmembrane, secreted, and GPI-anchored semaphorins in vertebrates. *Cell* 99: 71–80.
79. Tamagnone L, Comoglio PM (2004) To move or not to move? Semaphorin signalling in cell migration. *EMBO Rep* 5: 356–361.
80. Toyofuku T, Zhang H, Kumanogoh A, Takegahara N, Suto F, et al. (2004) Dual roles of Sema6D in cardiac morphogenesis through region-specific association of its receptor, Plexin-A1, with off-track and vascular endothelial growth factor receptor type 2. *Genes Dev* 18: 435–447.
81. O'Connor BP, Eun SY, Ye Z, Zozulya AL, Lich JD, et al. (2008) Semaphorin 6D regulates the late phase of CD4+ T cell primary immune responses. *Proc Natl Acad Sci U S A* 105: 13015–13020.
82. Sadanandam A, Rosenbaugh EG, Singh S, Varney M, Singh RK (2010) Semaphorin 5A promotes angiogenesis by increasing endothelial cell proliferation, migration, and decreasing apoptosis. *Microvasc Res* 79: 1–9.
83. Johnson C, Galis ZS (2004) Matrix metalloproteinase-2 and -9 differentially regulate smooth muscle cell migration and cell-mediated collagen organization. *Arterioscler Thromb Vasc Biol* 24: 54–60.
84. Luttun A, Lutgens E, Manderveld A, Maris K, Collen D, et al. (2004) Loss of matrix metalloproteinase-9 or matrix metalloproteinase-12 protects apolipoprotein E-deficient mice against atherosclerotic media destruction but differentially affects plaque growth. *Circulation* 109: 1408–1414.
85. Newby AC (2005) Dual role of matrix metalloproteinases (matrixins) in intimal thickening and atherosclerotic plaque rupture. *Physiol Rev* 85: 1–31.
86. Li H, Liang J, Castrillon DH, DePinho RA, Olson EN, et al. (2007) FoxO4 regulates tumor necrosis factor alpha-directed smooth muscle cell migration by activating matrix metalloproteinase 9 gene transcription. *Mol Cell Biol* 27: 2676–2686.
87. Liang Y, Tedder TF (2001) Identification of a CD20-, FcepsilonRIbeta-, and HTm4-related gene family: sixteen new MSA family members expressed in human and mouse. *Genomics* 72: 119–127.
88. Nolan DK, Sutton B, Haynes C, Johnson J, Sebek J, et al. (2012) Fine mapping of a linkage peak with integration of lipid traits identifies novel coronary artery disease genes on chromosome 5. *BMC Genet* 13: 12.
89. Traylor M, Farrall M, Holliday EG, Sudlow C, Hopewell JC, et al. (2012) Genetic risk factors for ischaemic stroke and its subtypes (the METASTROKE collaboration): a meta-analysis of genome-wide association studies. *Lancet Neurol* 11: 951–962.
90. Bevan S, Traylor M, Adib-Samii P, Malik R, Paul NL, et al. (2012) Genetic heritability of ischemic stroke and the contribution of previously reported candidate gene and genome-wide associations. *Stroke* 43: 3161–3167.
91. Smith JG, Melander O, Sjogren M, Hedblad B, Engstrom G, et al. (2013) Genetic polymorphisms confer risk of atrial fibrillation in patients with heart failure: a population-based study. *Eur J Heart Fail* 15: 250–257.
92. Kent WJ, Hsu F, Karolchik D, Kuhn RM, Clawson H, et al. (2005) Exploring relationships and mining data with the UCSC Gene Sorter. *Genome Res* 15: 737–741.
93. Kohler R (2010) Single-nucleotide polymorphisms in vascular Ca2+-activated K+-channel genes and cardiovascular disease. *Pflügers Arch* 460: 343–351.
94. Senti M, Fernandez-Fernandez JM, Tomas M, Vazquez E, Elosua R, et al. (2005) Protective effect of the KCNMB1 E65K genetic polymorphism against diastolic hypertension in aging women and its relevance to cardiovascular risk. *Circ Res* 97: 1360–1365.
95. Toyama K, Wulff H, Chandy KG, Azam P, Raman G, et al. (2008) The intermediate-conductance calcium-activated potassium channel KCa3.1 contributes to atherogenesis in mice and humans. *J Clin Invest* 118: 3025–3037.
96. Moriwaki K, Shinzaki S, Miyoshi E (2011) GDP-mannose-4,6-dehydratase (GMDS) deficiency renders colon cancer cells resistant to tumor necrosis factor-related apoptosis-inducing ligand (TRAIL) receptor- and CD95-mediated apoptosis by inhibiting complex II formation. *J Biol Chem* 286: 43123–43133.
97. Prunusil P, Timmusk T (2012) Subcellular localization and transcription regulatory potency of KCNIP/Calsenilin/DREAM/KChIP proteins in cultured primary cortical neurons do not provide support for their role in CRE-dependent gene expression. *J Neurochem* 123: 29–43.
98. Bourdeau ML, Laplante I, Laurent CE, Lacaille JC (2011) KChIP1 modulation of Kv4.3-mediated A-type K(+) currents and repetitive firing in hippocampal interneurons. *Neuroscience* 176: 173–187.
99. Surapureddi S, Yu S, Bu H, Hashimoto T, Yeldandi AV, et al. (2002) Identification of a transcriptionally active peroxisome proliferator-activated receptor alpha-interacting cofactor complex in rat liver and characterization of PRIC285 as a coactivator. *Proc Natl Acad Sci U S A* 99: 11836–11841.
100. Gervois P, Mansouri RM (2012) PPARalpha as a therapeutic target in inflammation-associated diseases. *Expert Opin Ther Targets* 16: 1113–1125.
101. Schunkert H, König IR, Kathiresan S, Reilly MP, Assimes TL, et al. (2011) Large-scale association analysis identifies 13 new susceptibility loci for coronary artery disease. *Nat Genet* 43: 333–338.
